# Supplementary material
Source: HighWire-hosted journal article supplement (https://informatics.bmj.com/content/26/1/e000023)
Supplement: inline-supplementary-material-2 [file inline-supplementary-material-2.pdf]

## Appendix B: Screening Questions

### Level 1 Screening Questions

1. Is the study focused on Information Technologies (IT) in relation to electronic or computerized patient records and not just as a data source? (could include but is not limited to Electronic Health Records, Electronic Patient Records, Computerized Patient Records, Computerized Medical Records, Computerized Health Records along with proper names for programs being used)
  - a. Yes
  - b. No
  - c. Don't know
2. Does the study focus on EMR use (not the adoption or implementation of EMRs)?
  - a. Yes
  - b. No
  - c. Don't know
3. Is it a study that either implements or observes an intervention with the intent of observing its effect on EMR use? (interventions could include but are not limited to: Educational Interventions, Computer Training, feedback, Work Flow, Practice Management, Office Management, Computer Assisted Diagnosis, Practice Guidelines, Guideline adherence or Training Support)
  - a. Yes
  - b. No
  - c. Don't know
4. Was the study conducted in a primary health care setting? (such as patients' homes, physicians' clinics, physicians' offices, chronic health and primary health units)
  - a. Yes
  - b. No
  - c. Don't know
5. Is it a research study (not an editorial, opinion, case report)?
  - a. Yes
  - b. No
  - c. Don't know

### Level 2 Screening Questions

1. Does the study target primary health care settings or personnel?
  - a. Yes
  - b. No
  - c. Don't know
2. Is there a planned intervention implemented or observed with the intention of improving EMR use?
  - a. Yes
  - b. No
  - c. Don't know
3. Does the study report measurements of use (the frequency of use, level of use or variety of use) of EMRs?
  - a. Yes
  - b. No
  - c. Don't know
